# Supplementary material for: Prognostic Performance of Metabolic Indexes in Predicting Onset of Type 1 Diabetes
Source: PubMed Central journal article supplement — Diabetes Care. 2010 Aug 31;33(12):2508–13. doi: 10.2337/dc10-0802 (PMC2992179; doi:10.2337/dc10-0802), 2010-08-31

Figure A1: Kaplan-meier curves by the level of OGTT 2-hour glucose

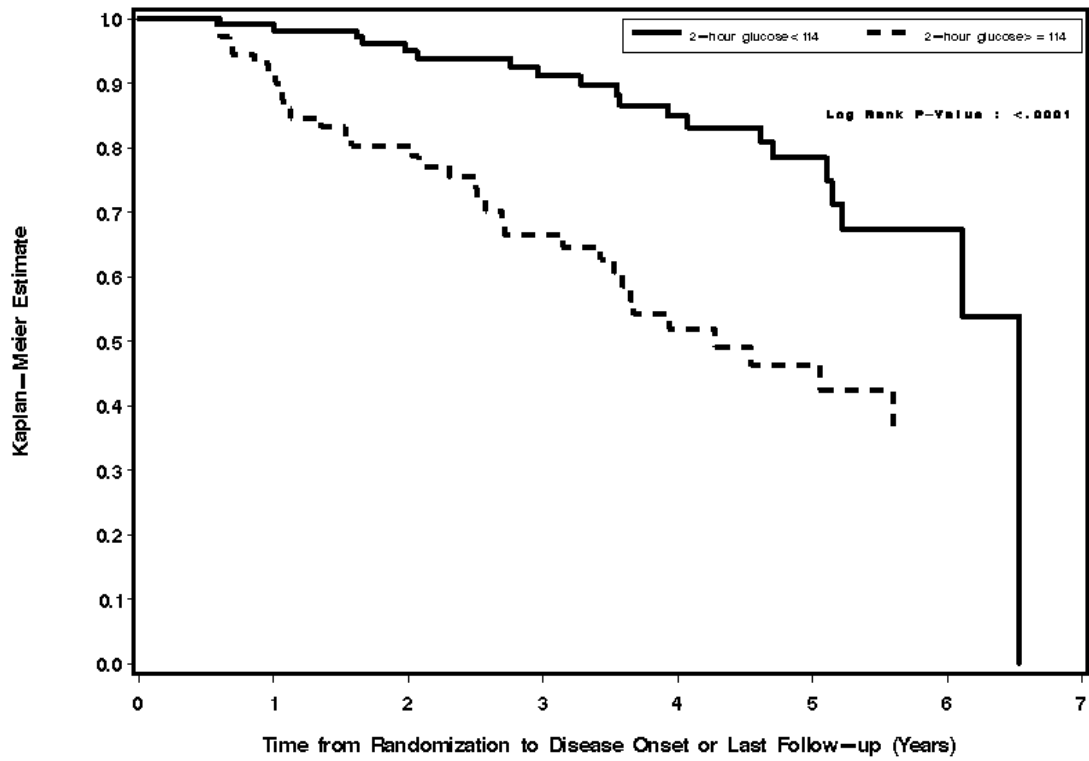

Figure A2: Kaplan-meier curves by the level of IVGTT FPIR/HOMA-IR

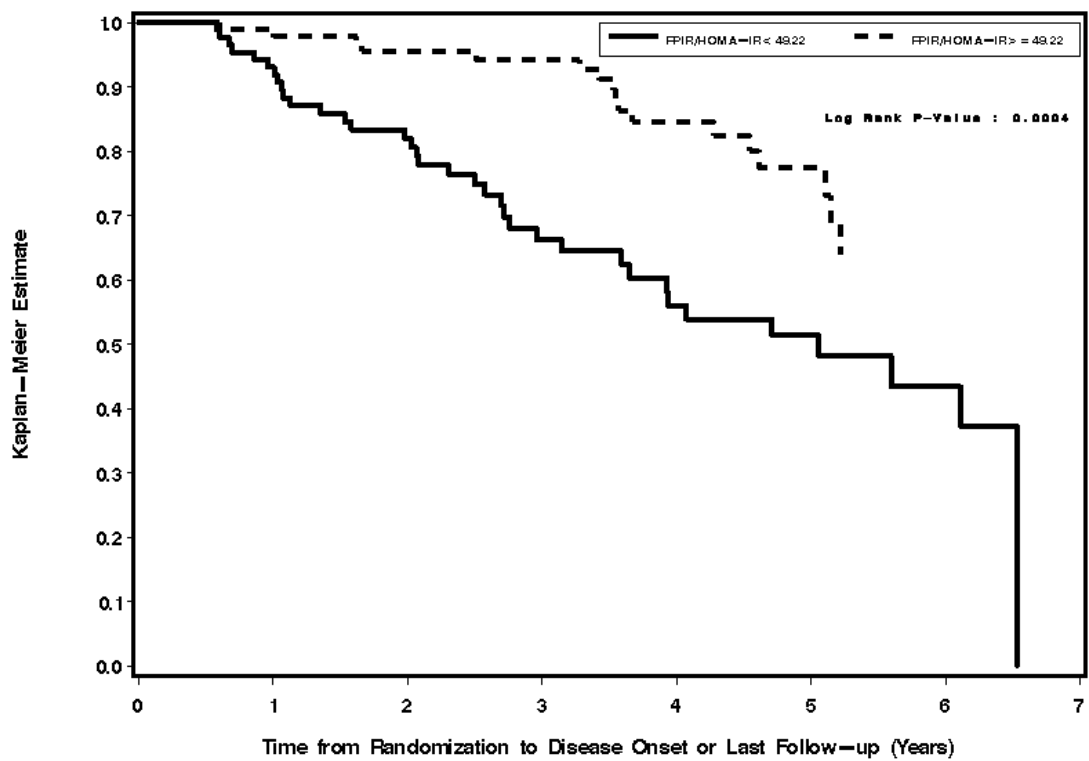

Supplement: supp_dc10-0802_dc100802Onlineappendix.pdf [file supp_dc10-0802_dc100802Onlineappendix.pdf]
